# Supplementary material for: Effect of elevated nitrate and sulfate concentrations on selenate removal by mesophilic anaerobic granular sludge bed reactors
Source: Royal Society of Chemistry journal article supplement (doi:10.1039/c7ew00307b), 2017-12-06
Supplement: c7ew00307b1.pdf [file c7ew00307b1.pdf]

1 **Supplementary material**

2

3 Effect of elevated nitrate and sulfate concentrations on selenate

4 removal by mesophilic anaerobic granular sludge bed reactors

5 Lea Chua Tan<sup>a\*</sup>, Yarlagadda V. Nancharaiiah<sup>b</sup>, Eric D. van Hullebusch<sup>c</sup> and Piet N. L. Lens<sup>a,d</sup>

6

7 <sup>a</sup>UNESCO-IHE Institute for Water Education, Westvest 7, 2611 AX Delft, The Netherlands

8 <sup>b</sup>Biofouling and Biofilm Process Section, Water and Steam Chemistry Division, Bhabha

9 Atomic Research Centre Kalpakkam – 603102, Tamil Nadu, India

10 <sup>c</sup>Université Paris-Est, Laboratoire Géomatériaux et Environnement (EA 4508), UPEM,

11 77454 Marne-la-Vallée, France

12 <sup>d</sup>Department of Chemistry and Bioengineering, Tampere University of Technology, P.O-Box

13 541, Tampere, Finland

14

15 Submitted to: *Environmental Science: Water Research & Technology*

16

17 \*Corresponding author:

18 Lea Chua Tan: lea\_chua\_tan@yahoo.com; +31-6-4414-6325

19 **Method for FISH imaging**

20

21 The microbial communities present in the sludge samples were qualitatively analyzed using  
22 fluorescence in situ hybridization (FISH). Vigorous biomass mixing within the reactor was  
23 done first by increasing the liquid upflow velocity to ensure a good representation of biomass  
24 sampling. All microbial cells were visualized by DAPI staining with specific oligonucleotide  
25 probes ARCH915 <sup>1</sup> and EUB I-III <sup>2</sup> for archaeal and bacterial cells, respectively. Two  
26 subgroups of the proteobacteria (beta-proteobacteria and gamma-proteobacteria) were included  
27 using BET42a and GAMMA42a probes. <sup>3</sup> Sulfate-reducing bacteria (SRB) were visualized  
28 using the *Desulfobulbaceae* DBB60 <sup>1</sup> and *Desulfovibrionales* SRB385 <sup>4</sup> probes. The inoculum  
29 anaerobic granular sludge was used as the control.

30

31 **Table S1** Batch test results with standard deviation after 5 days incubation under different molar ratios of  $\text{NO}_3^-$  and  $\text{SO}_4^{2-}$  to  $\text{SeO}_4^{2-}$ .

| Condition/molar ratio                                                           | Lactate            |           | * $\text{NO}_3^-$  |           | $\text{SO}_4^{2-}$ |           | TDS           | $\text{SeO}_4^{2-}$             |           |       |
|---------------------------------------------------------------------------------|--------------------|-----------|--------------------|-----------|--------------------|-----------|---------------|---------------------------------|-----------|-------|
|                                                                                 | Initial conc. (mM) | % Removal | Initial conc. (mM) | % Removal | Initial conc. (mM) | % Removal | Produced (mM) | Initial conc. ( $\mu\text{M}$ ) | % Removal |       |
| Sterilized biomass                                                              | 21±1               | 0±0       | 2±1                | 0±0       | 3±1                | 0±0       | 0.0±0.0       | 179±0                           | 0±0       |       |
| No lactate added                                                                | n/a***             |           | 2±0                | 0±0       | 3±0                | 0±0       | 0.0±0.0       | 163±1                           | 0±0       |       |
| $\text{NO}_3^-$ only                                                            | 12±1               | 100±0     | 4±0                | 100±0     | n/a                | n/a       | n/a           | n/a                             | n/a       |       |
| $\text{SO}_4^{2-}$ only                                                         | 14±1               | 100±0     | n/a                | n/a       | 25±1               | 15±1      | 4.0±0.0       | n/a                             | n/a       |       |
| $\text{NO}_3^- + \text{SO}_4^{2-}$                                              | 14±0               | 100±0     | 4±1                | 100±0     | 24±0               | 6±2       | 3.0±0.0       | n/a                             | n/a       |       |
| $\text{SeO}_4^{2-}$ only                                                        | 25±4               | 83±0      | n/a                | n/a       | n/a                | n/a       | n/a           | 108±0                           | 67±2      |       |
| ** $\text{NO}_3^- / \text{SeO}_4^{2-}$                                          | 1                  | 13±0      | 100±0              | 0.5±0.0   | 100±0              | n/a       | n/a           | n/a                             | 410±0     | 62±12 |
|                                                                                 | 20                 | 17±2      | 85±3               | 2±0       | 100±0              | n/a       | n/a           | n/a                             | 96±0      | 100±0 |
|                                                                                 | 40                 | 17±2      | 85±3               | 4±0       | 100±0              | n/a       | n/a           | n/a                             | 141±0     | 91±12 |
|                                                                                 | 70                 | 19±2      | 90±1               | 7±0       | 100±0              | n/a       | n/a           | n/a                             | 117±0     | 81±10 |
|                                                                                 | 100                | 18±)      | 92±1               | 10±0      | 100±0              | n/a       | n/a           | n/a                             | 98±0      | 59±4  |
| $\text{SO}_4^{2-} / \text{SeO}_4^{2-}$                                          | 1                  | 13±0      | 91±2               | n/a       | n/a                | 0.5±0.0   | 63±9          | 0.3±0.2                         | 410±0     | 71±4  |
|                                                                                 | 50                 | 24±4      | 83±2               | n/a       | n/a                | 4±0       | 39±10         | 0.5±0.2                         | 236±0     | 85±0  |
|                                                                                 | 100                | 24±5      | 92±0               | n/a       | n/a                | 9±1       | 28±1          | 1.0±0.2                         | 237±0     | 79±1  |
|                                                                                 | 150                | 24±5      | 86±1               | n/a       | n/a                | 14±1      | 23±1          | 1.0±0.2                         | 194±0     | 40±0  |
|                                                                                 | 200                | 24±3      | 92±1               | n/a       | n/a                | 20±1      | 25±7          | 0.9±0.3                         | 235±0     | 52±0  |
|                                                                                 | 300                | 22±4      | 89±1               | n/a       | n/a                | 28±1      | 16±1          | 1.7±0.9                         | 247±0     | 39±1  |
| $\text{SO}_4^{2-} / \text{SeO}_4^{2-}$ with co-exposure of 4 mM $\text{NO}_3^-$ | 1                  | 13±0      | 92±1               | 0.5±0.0   | 100±0              | 0.5±0.0   | 27±4          | 0.1± 0.0                        | 500±0     | 100±0 |
|                                                                                 | 50                 | 25±3      | 86±0               | 3±1       | 100±0              | 4±0       | 30±2          | 0.3±0.1                         | 201±0     | 92±1  |
|                                                                                 | 100                | 24±5      | 84±1               | 3±1       | 100±0              | 9±1       | 25±5          | 0.7±0.3                         | 197±0     | 91±1  |
|                                                                                 | 150                | 24±4      | 86±0               | 3±1       | 100±0              | 14±1      | 25±6          | 0.6±0.2                         | 217±0     | 61±2  |
|                                                                                 | 200                | 24±5      | 92±1               | 3±1       | 100±0              | 19±1      | 20±4          | 0.4±0.0                         | 240±)     | 61±2  |
|                                                                                 | 300                | 24±5      | 92±1               | 3±1       | 100±0              | 31±1      | 19±3          | 0.5±0.1                         | 221±0     | 32±0  |

Note: results are all reported as mean ± standard deviation, n = 4 replicates (total); \* $\text{NO}_3^-$  concentration reached 100% removal for all concentration at 48 h; n/a – not applicable

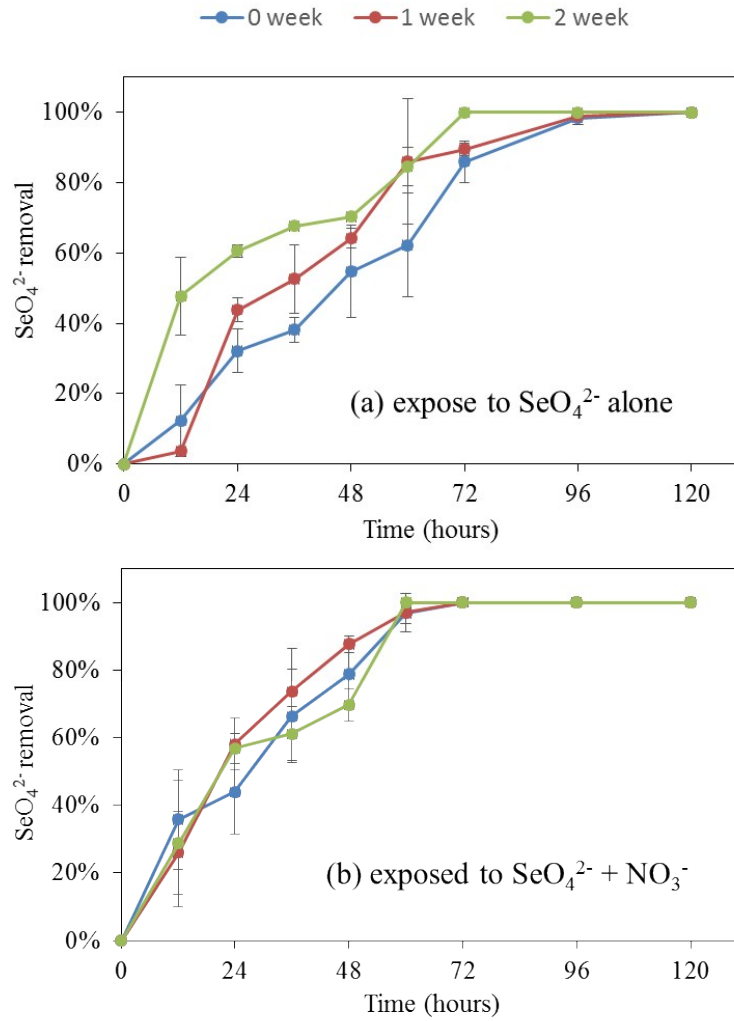

33

34 **Fig. S1**  $\text{SeO}_4^{2-}$  reduction using untreated sludge and treated sludge (reused from the previous  
 35 week) (a) expose only to  $\text{SeO}_4^{2-}$  and (b) expose to both  $\text{NO}_3^-$  and  $\text{SeO}_4^{2-}$ . Batch experiments  
 36 were conducted under excess lactate (10mM), 30°C, 200 rpm and pH 7.0.

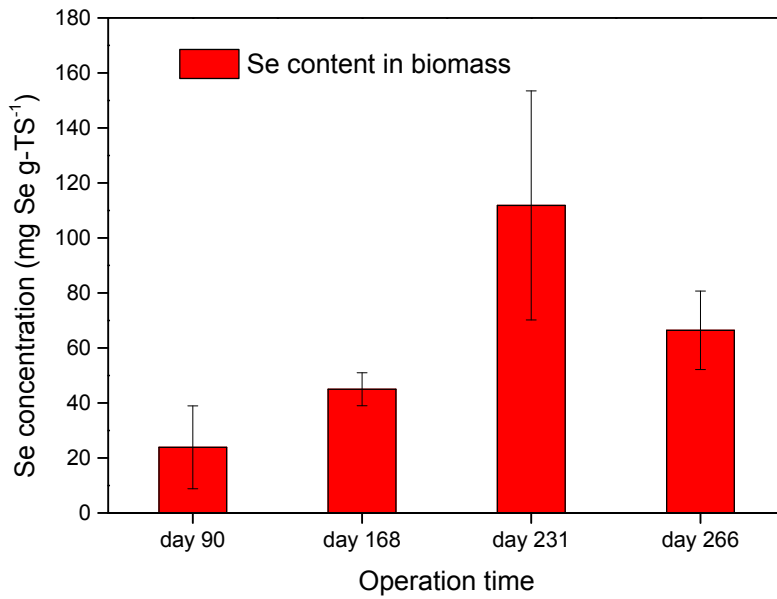

37

38 **Fig. S2** Se concentration detected in the biomass at various operation times (n=3 biomass  
 39 sample replicate at each time period).

40

41

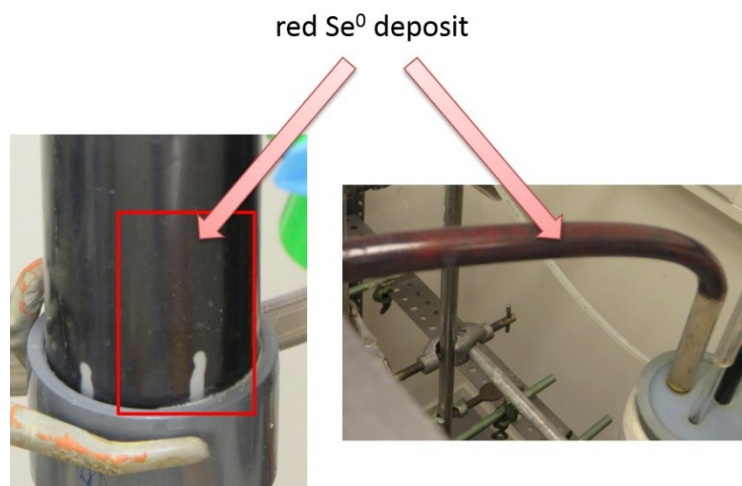

42

43 **Fig. S3** Red-color formation in the reactor walls and tubings due to Se<sup>0</sup> production.

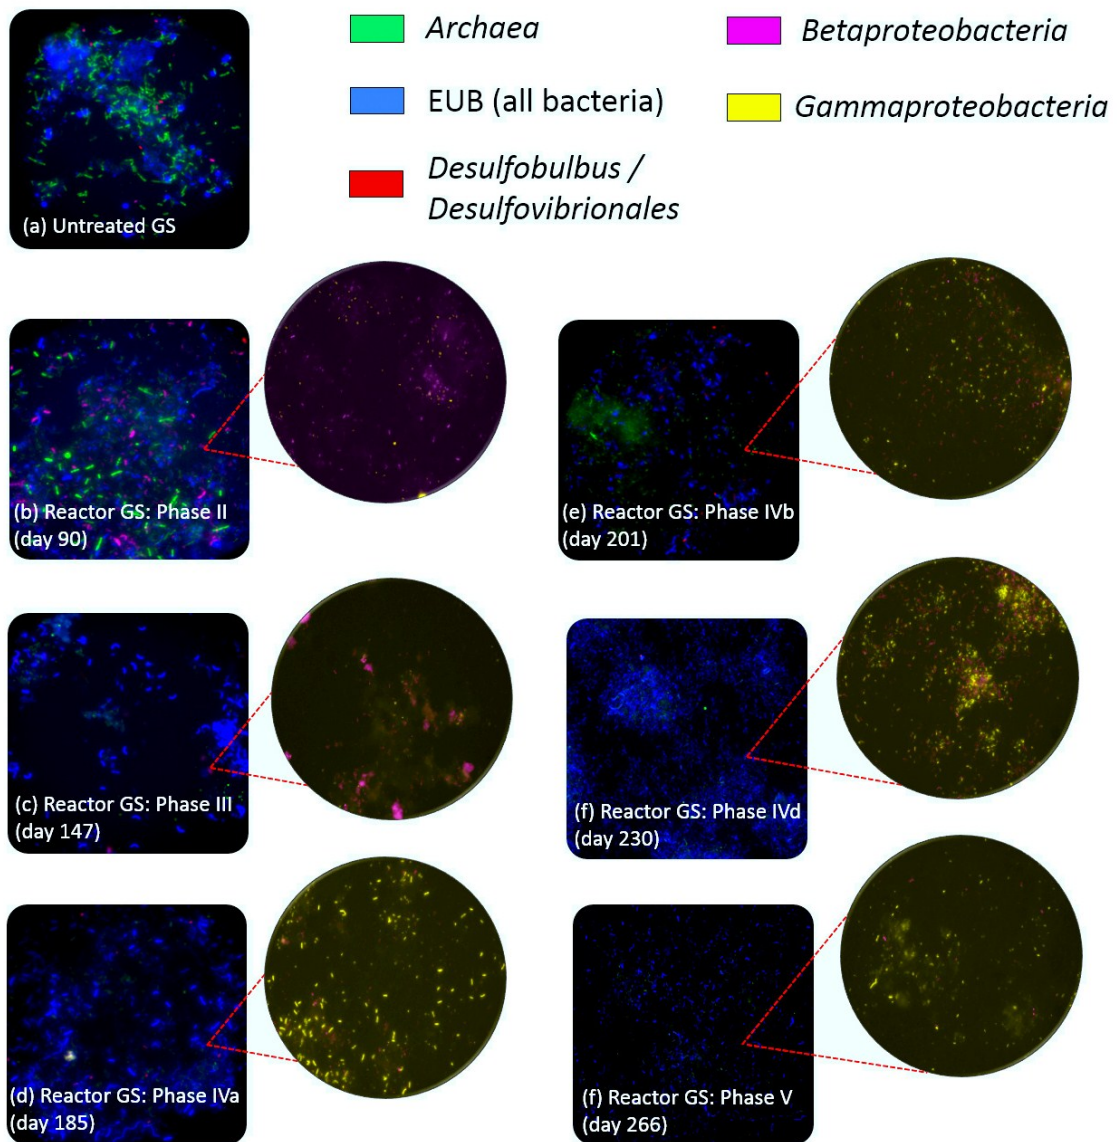

44

45 **Fig. S4** Microbial community analysis of anaerobic granular sludge sampled from the  
 46 laboratory-scale UASB reactor using *fluorescence in situ hybridization* (FISH) technique.  
 47 FISH images are grouped into EUB-SRB-Archaea (box shape) and BETA-GAMMA (circle  
 48 shape).

49

50 **References**

51 1 Y. Sekiguchi, Y. Kamagata, K. Nakamura, A. Ohashi and H. Harada, 1999, **65**, 1280–  
52 1288.

53 2 H. Daims, A. Brühl, R. Amann, K.-H. Schleifer and M. Wagner, *Syst. Appl. Microbiol.*,  
54 1999, **22**, 434–444.

55 3 H. Lee, Y. Park, E. Choi and J. Lee, *J. Microbiol. Biotechnol.*, 2008, **18**, 1826–1835.

56 4 R. I. Amann, B. J. Binder, R. J. Olson, S. W. Chisholm, R. Devereux and D. A. Stahl,  
57 *Appl Env. Microbiol*, 1990, **56**, 1919–1925.

58

59
